# Supplementary material for: Periwinkle climbing response to water- and airbone predator chemical cues may depend on home-marsh geography
Source: PeerJ. 2018 Oct 1;6:e5744. doi: 10.7717/peerj.5744 (PMC6171496; doi:10.7717/peerj.5744)
Supplement: Supplemental Information 1 — Raw data of snail climbing heights in the presence or absence of predator chemical cues. Sheet 1 is the metadata, highlighting the collection locations, cue types and height descriptions. Sheet 2 is the data from the single population experiments, and Sheet 3 is the mixed population treatments. [file peerj-06-5744-s001.xlsx]

## Sheet: Metadata
Sites
LA = Louisiana, collection site 29°15′20.65″N, 90°39′42.93″W
NC = North Carolina, collection site 34o08’26.26”N, 077o51’47.81”W
Trial and Box
Trial = trial number for the experiments, 2 trials were used in each experiment
Box = identifier for tubs which 30 snails were placed, since these are not independent individuals. There were 6 boxes for each trial
Treatments
Air = Airborne cue, crab present, but water not allowed to mix between crab container and snail containers
Water = Waterborne cue, crab present and water allowed to mix between crab and snail containers
No Odor = no crab present, control
Height
Height above the bottom of the container, in cm. *NOTE: water level was 12.5cm, and snails were attached to PVC at 17cm, so any snails below 17cm moved down and any snails below 12.5cm were submerged

## Sheet: SinPopNC
Trial	Box_No	Site	Treatment	Snail_No	height
1	1	NC	Control	1	10.4
1	1	NC	Control	2	20.5
1	1	NC	Control	3	43.7
1	1	NC	Control	4	9.9
1	1	NC	Control	5	20.1
1	1	NC	Control	6	38.2
1	1	NC	Control	7	33.5
1	1	NC	Control	8	31.7
1	1	NC	Control	9	10.5
1	1	NC	Control	10	26.6
1	1	NC	Control	11	41.7
1	1	NC	Control	12	42.4
1	1	NC	Control	13	40
1	1	NC	Control	14	25.5
1	1	NC	Control	15	11.1
1	1	NC	Control	16	36
1	1	NC	Control	17	13.9
1	1	NC	Control	18	50
1	1	NC	Control	19	11
1	1	NC	Control	20	12.4
1	1	NC	Control	21	19.1
1	1	NC	Control	22	28.4
1	1	NC	Control	23	18.6
1	1	NC	Control	24	10.5
1	1	NC	Control	25	40
1	1	NC	Control	26	29.3
1	1	NC	Control	27	36
1	1	NC	Control	28	0
1	1	NC	Control	29	0
1	1	NC	Control	30	27.3
1	2	NC	Control	1	9.3
1	2	NC	Control	2	34.6
1	2	NC	Control	3	33
1	2	NC	Control	4	15.5
1	2	NC	Control	5	34.2
1	2	NC	Control	6	25
1	2	NC	Control	7	10.3
1	2	NC	Control	8	39
1	2	NC	Control	9	14.1
1	2	NC	Control	10	9.8
1	2	NC	Control	11	25
1	2	NC	Control	12	19.1
1	2	NC	Control	13	9.6
1	2	NC	Control	14	9.7
1	2	NC	Control	15	17
1	2	NC	Control	16	10
1	2	NC	Control	17	9.1
1	2	NC	Control	18	8.7
1	2	NC	Control	19	20.2
1	2	NC	Control	20	22
1	2	NC	Control	21	19.5
1	2	NC	Control	22	46.3
1	2	NC	Control	23	19.9
1	2	NC	Control	24	20.6
1	2	NC	Control	25	51.6
1	2	NC	Control	26	8.2
1	2	NC	Control	27	22.5
1	2	NC	Control	28	0
1	2	NC	Control	29	0
1	2	NC	Control	30	17.2
1	3	NC	Control	1	37.2
1	3	NC	Control	2	21.3
1	3	NC	Control	3	21.8
1	3	NC	Control	4	18.1
1	3	NC	Control	5	26.2
1	3	NC	Control	6	18.5
1	3	NC	Control	7	19.6
1	3	NC	Control	8	21.1
1	3	NC	Control	9	17.5
1	3	NC	Control	10	40.3
1	3	NC	Control	11	19
1	3	NC	Control	12	26
1	3	NC	Control	13	9.1
1	3	NC	Control	14	15
1	3	NC	Control	15	15.6
1	3	NC	Control	16	22.5
1	3	NC	Control	17	7.1
1	3	NC	Control	18	8.9
1	3	NC	Control	19	33.9
1	3	NC	Control	20	31.1
1	3	NC	Control	21	18.5
1	3	NC	Control	22	16
1	3	NC	Control	23	23.7
1	3	NC	Control	24	22.4
1	3	NC	Control	25	22.1
1	3	NC	Control	26	13.4
1	3	NC	Control	27	29.5
1	3	NC	Control	28	27.4
1	3	NC	Control	29	16.1
1	3	NC	Control	30	8.1
1	4	NC	Airborne	1	38
1	4	NC	Airborne	2	36.4
1	4	NC	Airborne	3	33.5
1	4	NC	Airborne	4	31.6
1	4	NC	Airborne	5	31.8
1	4	NC	Airborne	6	27.2
1	4	NC	Airborne	7	18.3
1	4	NC	Airborne	8	15.5
1	4	NC	Airborne	9	10.9
1	4	NC	Airborne	10	40
1	4	NC	Airborne	11	28.7
1	4	NC	Airborne	12	33
1	4	NC	Airborne	13	57.1
1	4	NC	Airborne	14	40.1
1	4	NC	Airborne	15	0
1	4	NC	Airborne	16	25.5
1	4	NC	Airborne	17	9.9
1	4	NC	Airborne	18	11
1	4	NC	Airborne	19	12.1
1	4	NC	Airborne	20	14.1
1	4	NC	Airborne	21	24.5
1	4	NC	Airborne	22	25.4
1	4	NC	Airborne	23	25
1	4	NC	Airborne	24	13.2
1	4	NC	Airborne	25	11.1
1	4	NC	Airborne	26	10.2
1	4	NC	Airborne	27	11.2
1	4	NC	Airborne	28	12.4
1	4	NC	Airborne	29	44.3
1	4	NC	Airborne	30	38.2
1	5	NC	Airborne	1	25.5
1	5	NC	Airborne	2	19.3
1	5	NC	Airborne	3	18.1
1	5	NC	Airborne	4	4
1	5	NC	Airborne	5	4.2
1	5	NC	Airborne	6	61.1
1	5	NC	Airborne	7	35.8
1	5	NC	Airborne	8	12.1
1	5	NC	Airborne	9	67.3
1	5	NC	Airborne	10	39.5
1	5	NC	Airborne	11	37.9
1	5	NC	Airborne	12	36.2
1	5	NC	Airborne	13	16.8
1	5	NC	Airborne	14	15.3
1	5	NC	Airborne	15	17
1	5	NC	Airborne	16	68.5
1	5	NC	Airborne	17	34.5
1	5	NC	Airborne	18	38.1
1	5	NC	Airborne	19	20
1	5	NC	Airborne	20	25.1
1	5	NC	Airborne	21	21.5
1	5	NC	Airborne	22	22.1
1	5	NC	Airborne	23	22
1	5	NC	Airborne	24	32.5
1	5	NC	Airborne	25	49.1
1	5	NC	Airborne	26	7.5
1	5	NC	Airborne	27	11
1	5	NC	Airborne	28	10.1
1	5	NC	Airborne	29	8.8
1	5	NC	Airborne	30	9.5
1	6	NC	Airborne	1	30.2
1	6	NC	Airborne	2	25.2
1	6	NC	Airborne	3	26.5
1	6	NC	Airborne	4	14.5
1	6	NC	Airborne	5	7.6
1	6	NC	Airborne	6	17.1
1	6	NC	Airborne	7	13.5
1	6	NC	Airborne	8	2.3
1	6	NC	Airborne	9	15.7
1	6	NC	Airborne	10	17.1
1	6	NC	Airborne	11	24.5
1	6	NC	Airborne	12	7.6
1	6	NC	Airborne	13	8.3
1	6	NC	Airborne	14	8.1
1	6	NC	Airborne	15	0
1	6	NC	Airborne	16	23
1	6	NC	Airborne	17	17.4
1	6	NC	Airborne	18	20.6
1	6	NC	Airborne	19	18.2
1	6	NC	Airborne	20	12.4
1	6	NC	Airborne	21	0
1	6	NC	Airborne	22	27.9
1	6	NC	Airborne	23	25.8
1	6	NC	Airborne	24	14.3
1	6	NC	Airborne	25	6.3
1	6	NC	Airborne	26	5.2
1	6	NC	Airborne	27	8.9
1	6	NC	Airborne	28	28
1	6	NC	Airborne	29	16.1
1	6	NC	Airborne	30	19.5
2	1	NC	Waterborne	1	20.2
2	1	NC	Waterborne	2	36
2	1	NC	Waterborne	3	34.2
2	1	NC	Waterborne	4	17.1
2	1	NC	Waterborne	5	10.8
2	1	NC	Waterborne	6	23.3
2	1	NC	Waterborne	7	22.3
2	1	NC	Waterborne	8	37.9
2	1	NC	Waterborne	9	38.8
2	1	NC	Waterborne	10	27
2	1	NC	Waterborne	11	25.2
2	1	NC	Waterborne	12	24.5
2	1	NC	Waterborne	13	30.6
2	1	NC	Waterborne	14	43.1
2	1	NC	Waterborne	15	18.1
2	1	NC	Waterborne	16	23.8
2	1	NC	Waterborne	17	22
2	1	NC	Waterborne	18	20.7
2	1	NC	Waterborne	19	25
2	1	NC	Waterborne	20	38.2
2	1	NC	Waterborne	21	34.3
2	1	NC	Waterborne	22	31.5
2	1	NC	Waterborne	23	23.1
2	1	NC	Waterborne	24	18.7
2	1	NC	Waterborne	25	45.5
2	1	NC	Waterborne	26	4.8
2	1	NC	Waterborne	27	26.9
2	1	NC	Waterborne	28	22.7
2	1	NC	Waterborne	29	37.8
2	1	NC	Waterborne	30	36.2
2	2	NC	Waterborne	1	37.5
2	2	NC	Waterborne	2	27.6
2	2	NC	Waterborne	3	26.2
2	2	NC	Waterborne	4	21
2	2	NC	Waterborne	5	20.4
2	2	NC	Waterborne	6	16.1
2	2	NC	Waterborne	7	14.5
2	2	NC	Waterborne	8	7.2
2	2	NC	Waterborne	9	48.2
2	2	NC	Waterborne	10	42.3
2	2	NC	Waterborne	11	20.9
2	2	NC	Waterborne	12	66.3
2	2	NC	Waterborne	13	33
2	2	NC	Waterborne	14	20.2
2	2	NC	Waterborne	15	29.1
2	2	NC	Waterborne	16	22.5
2	2	NC	Waterborne	17	22.5
2	2	NC	Waterborne	18	41.7
2	2	NC	Waterborne	19	34.4
2	2	NC	Waterborne	20	33.1
2	2	NC	Waterborne	21	63.5
2	2	NC	Waterborne	22	44.8
2	2	NC	Waterborne	23	29.2
2	2	NC	Waterborne	24	18.9
2	2	NC	Waterborne	25	34
2	2	NC	Waterborne	26	32.5
2	2	NC	Waterborne	27	40
2	2	NC	Waterborne	28	12.4
2	2	NC	Waterborne	29	16
2	2	NC	Waterborne	30	11.2
2	3	NC	Waterborne	1	42
2	3	NC	Waterborne	2	40
2	3	NC	Waterborne	3	30.8
2	3	NC	Waterborne	4	8.1
2	3	NC	Waterborne	5	27.2
2	3	NC	Waterborne	6	24.7
2	3	NC	Waterborne	7	6.9
2	3	NC	Waterborne	8	53.4
2	3	NC	Waterborne	9	6
2	3	NC	Waterborne	10	27.1
2	3	NC	Waterborne	11	33.9
2	3	NC	Waterborne	12	39.5
2	3	NC	Waterborne	13	6.2
2	3	NC	Waterborne	14	6.1
2	3	NC	Waterborne	15	25.3
2	3	NC	Waterborne	16	17
2	3	NC	Waterborne	17	14.2
2	3	NC	Waterborne	18	25.9
2	3	NC	Waterborne	19	25
2	3	NC	Waterborne	20	39.7
2	3	NC	Waterborne	21	25.5
2	3	NC	Waterborne	22	22.1
2	3	NC	Waterborne	23	45.5
2	3	NC	Waterborne	24	19.6
2	3	NC	Waterborne	25	16
2	3	NC	Waterborne	26	13.8
2	3	NC	Waterborne	27	13.1
2	3	NC	Waterborne	28	32.4
2	3	NC	Waterborne	29	23.1
2	3	NC	Waterborne	30	17.4
2	4	NC	Airborne	1	37.2
2	4	NC	Airborne	2	33.4
2	4	NC	Airborne	3	43.5
2	4	NC	Airborne	4	9.1
2	4	NC	Airborne	5	9
2	4	NC	Airborne	6	8.7
2	4	NC	Airborne	7	64.2
2	4	NC	Airborne	8	24.5
2	4	NC	Airborne	9	18.7
2	4	NC	Airborne	10	9.1
2	4	NC	Airborne	11	20.1
2	4	NC	Airborne	12	19.3
2	4	NC	Airborne	13	25.6
2	4	NC	Airborne	14	36.7
2	4	NC	Airborne	15	26
2	4	NC	Airborne	16	37.9
2	4	NC	Airborne	17	37.1
2	4	NC	Airborne	18	20.1
2	4	NC	Airborne	19	12.4
2	4	NC	Airborne	20	9.3
2	4	NC	Airborne	21	9.2
2	4	NC	Airborne	22	3
2	4	NC	Airborne	23	5.1
2	4	NC	Airborne	24	0
2	4	NC	Airborne	25	0
2	4	NC	Airborne	26	11.2
2	4	NC	Airborne	27	7.5
2	4	NC	Airborne	28	8
2	4	NC	Airborne	29	4.1
2	4	NC	Airborne	30	16.4
2	5	NC	Airborne	1	55.5
2	5	NC	Airborne	2	30.4
2	5	NC	Airborne	3	17.4
2	5	NC	Airborne	4	15.9
2	5	NC	Airborne	5	14.2
2	5	NC	Airborne	6	11.5
2	5	NC	Airborne	7	7
2	5	NC	Airborne	8	33
2	5	NC	Airborne	9	27.9
2	5	NC	Airborne	10	28.8
2	5	NC	Airborne	11	6.1
2	5	NC	Airborne	12	28.9
2	5	NC	Airborne	13	22.6
2	5	NC	Airborne	14	7.4
2	5	NC	Airborne	15	28.4
2	5	NC	Airborne	16	9.1
2	5	NC	Airborne	17	6.7
2	5	NC	Airborne	18	9.6
2	5	NC	Airborne	19	31.1
2	5	NC	Airborne	20	27.2
2	5	NC	Airborne	21	17.2
2	5	NC	Airborne	22	18.9
2	5	NC	Airborne	23	8.2
2	5	NC	Airborne	24	16.4
2	5	NC	Airborne	25	24.5
2	5	NC	Airborne	26	19.8
2	5	NC	Airborne	27	20.5
2	5	NC	Airborne	28	27
2	5	NC	Airborne	29	10.7
2	5	NC	Airborne	30
2	6	NC	Airborne	1	8.4
2	6	NC	Airborne	2	20.1
2	6	NC	Airborne	3	27.9
2	6	NC	Airborne	4	30.9
2	6	NC	Airborne	5	7.4
2	6	NC	Airborne	6	13.5
2	6	NC	Airborne	7	52.1
2	6	NC	Airborne	8	15
2	6	NC	Airborne	9	4.9
2	6	NC	Airborne	10	17.3
2	6	NC	Airborne	11	17.5
2	6	NC	Airborne	12	30.1
2	6	NC	Airborne	13	6.2
2	6	NC	Airborne	14	9.1
2	6	NC	Airborne	15	8
2	6	NC	Airborne	16	8.3
2	6	NC	Airborne	17	24.4
2	6	NC	Airborne	18	21
2	6	NC	Airborne	19	7.9
2	6	NC	Airborne	20	7.8
2	6	NC	Airborne	21	5
2	6	NC	Airborne	22	18.2
2	6	NC	Airborne	23	20.9
2	6	NC	Airborne	24	31.6
2	6	NC	Airborne	25	0
2	6	NC	Airborne	26	22.1
2	6	NC	Airborne	27	10.1
2	6	NC	Airborne	28	19.8
2	6	NC	Airborne	29	8
2	6	NC	Airborne	30	9.1

## Sheet: SinPopLA
Trial	Box_No	Site	Treatment	Snail_No	height
1	1	LA	Waterborne	1	73.4
1	1	LA	Waterborne	2	63.6
1	1	LA	Waterborne	3	48.4
1	1	LA	Waterborne	4	48.5
1	1	LA	Waterborne	5	39.6
1	1	LA	Waterborne	6	37.8
1	1	LA	Waterborne	7	36.1
1	1	LA	Waterborne	8	64.8
1	1	LA	Waterborne	9	63.6
1	1	LA	Waterborne	10	61.9
1	1	LA	Waterborne	11	61.8
1	1	LA	Waterborne	12	61.2
1	1	LA	Waterborne	13	52.3
1	1	LA	Waterborne	14	42
1	1	LA	Waterborne	15	64.5
1	1	LA	Waterborne	16	48.6
1	1	LA	Waterborne	17	44.9
1	1	LA	Waterborne	18	21.3
1	1	LA	Waterborne	19	66.4
1	1	LA	Waterborne	20	64.7
1	1	LA	Waterborne	21	62.9
1	1	LA	Waterborne	22	57.8
1	1	LA	Waterborne	23	56.1
1	1	LA	Waterborne	24	38.9
1	1	LA	Waterborne	25	59.9
1	1	LA	Waterborne	26	43.7
1	1	LA	Waterborne	27	67.4
1	1	LA	Waterborne	28	59.4
1	1	LA	Waterborne	29	48.8
1	1	LA	Waterborne	30	58.7
1	2	LA	Waterborne	1	72.8
1	2	LA	Waterborne	2	71.1
1	2	LA	Waterborne	3	66.9
1	2	LA	Waterborne	4	56.1
1	2	LA	Waterborne	5	19.2
1	2	LA	Waterborne	6	50.9
1	2	LA	Waterborne	7	38.6
1	2	LA	Waterborne	8	37.7
1	2	LA	Waterborne	9	19.8
1	2	LA	Waterborne	10	19.9
1	2	LA	Waterborne	11	66.2
1	2	LA	Waterborne	12	66.8
1	2	LA	Waterborne	13	68.6
1	2	LA	Waterborne	14	73.5
1	2	LA	Waterborne	15	66.7
1	2	LA	Waterborne	16	74.1
1	2	LA	Waterborne	17	47.7
1	2	LA	Waterborne	18	49.4
1	2	LA	Waterborne	19	62.5
1	2	LA	Waterborne	20	59.8
1	2	LA	Waterborne	21	70.3
1	2	LA	Waterborne	22	70.9
1	2	LA	Waterborne	23	66.9
1	2	LA	Waterborne	24	34.5
1	2	LA	Waterborne	25	33.4
1	2	LA	Waterborne	26	33.8
1	2	LA	Waterborne	27	21.8
1	2	LA	Waterborne	28	16.4
1	2	LA	Waterborne	29	73.9
1	2	LA	Waterborne	30	66.9
1	3	LA	Waterborne	1	65.3
1	3	LA	Waterborne	2	49.7
1	3	LA	Waterborne	3	47.5
1	3	LA	Waterborne	4	25.7
1	3	LA	Waterborne	5	73.7
1	3	LA	Waterborne	6	73.3
1	3	LA	Waterborne	7	65.9
1	3	LA	Waterborne	8	65.9
1	3	LA	Waterborne	9	28.8
1	3	LA	Waterborne	10	28.7
1	3	LA	Waterborne	11	39.8
1	3	LA	Waterborne	12	39.6
1	3	LA	Waterborne	13	38.3
1	3	LA	Waterborne	14	41.4
1	3	LA	Waterborne	15	32.2
1	3	LA	Waterborne	16	53.7
1	3	LA	Waterborne	17	42.8
1	3	LA	Waterborne	18	30.9
1	3	LA	Waterborne	19	18.5
1	3	LA	Waterborne	20	23.8
1	3	LA	Waterborne	21	61.1
1	3	LA	Waterborne	22	19.9
1	3	LA	Waterborne	23	74.8
1	3	LA	Waterborne	24	66.5
1	3	LA	Waterborne	25	64.3
1	3	LA	Waterborne	26	64.3
1	3	LA	Waterborne	27	61.6
1	3	LA	Waterborne	28	60.8
1	3	LA	Waterborne	29
1	3	LA	Waterborne	30
1	4	LA	Airborne	1	59.5
1	4	LA	Airborne	2	51.4
1	4	LA	Airborne	3	36.6
1	4	LA	Airborne	4	34
1	4	LA	Airborne	5	72.4
1	4	LA	Airborne	6	72.2
1	4	LA	Airborne	7	58.7
1	4	LA	Airborne	8	56.7
1	4	LA	Airborne	9	40
1	4	LA	Airborne	10	27.5
1	4	LA	Airborne	11	39
1	4	LA	Airborne	12	50.9
1	4	LA	Airborne	13	70.5
1	4	LA	Airborne	14	45.9
1	4	LA	Airborne	15	30.8
1	4	LA	Airborne	16	57.6
1	4	LA	Airborne	17	73.9
1	4	LA	Airborne	18	60.6
1	4	LA	Airborne	19	32.6
1	4	LA	Airborne	20	33.5
1	4	LA	Airborne	21	31.4
1	4	LA	Airborne	22	57.2
1	4	LA	Airborne	23	61.3
1	4	LA	Airborne	24	64.1
1	4	LA	Airborne	25	30.8
1	4	LA	Airborne	26	60.5
1	4	LA	Airborne	27	59.2
1	4	LA	Airborne	28	57.8
1	4	LA	Airborne	29	52.5
1	4	LA	Airborne	30	27.8
1	5	LA	Airborne	1	61.3
1	5	LA	Airborne	2	59.5
1	5	LA	Airborne	3	49.6
1	5	LA	Airborne	4	47.9
1	5	LA	Airborne	5	35.9
1	5	LA	Airborne	6	34.3
1	5	LA	Airborne	7	32.1
1	5	LA	Airborne	8	56.6
1	5	LA	Airborne	9	51.2
1	5	LA	Airborne	10	50.7
1	5	LA	Airborne	11	39.4
1	5	LA	Airborne	12	42.5
1	5	LA	Airborne	13	48.5
1	5	LA	Airborne	14	46.6
1	5	LA	Airborne	15	46.2
1	5	LA	Airborne	16	68
1	5	LA	Airborne	17	40.8
1	5	LA	Airborne	18	74.4
1	5	LA	Airborne	19	55.8
1	5	LA	Airborne	20	42.2
1	5	LA	Airborne	21	35.5
1	5	LA	Airborne	22	48.9
1	5	LA	Airborne	23	38.5
1	5	LA	Airborne	24	32.2
1	5	LA	Airborne	25	69.5
1	5	LA	Airborne	26	51.5
1	5	LA	Airborne	27	39.6
1	5	LA	Airborne	28	48.2
1	5	LA	Airborne	29	50.8
1	5	LA	Airborne	30	40.7
1	6	LA	Airborne	1	64.3
1	6	LA	Airborne	2	62.6
1	6	LA	Airborne	3	48.2
1	6	LA	Airborne	4	41.9
1	6	LA	Airborne	5	41.3
1	6	LA	Airborne	6	38.4
1	6	LA	Airborne	7	75.4
1	6	LA	Airborne	8	71.5
1	6	LA	Airborne	9	59.7
1	6	LA	Airborne	10	57.6
1	6	LA	Airborne	11	73.9
1	6	LA	Airborne	12	72.8
1	6	LA	Airborne	13	71.7
1	6	LA	Airborne	14	63.9
1	6	LA	Airborne	15	65.5
1	6	LA	Airborne	16	74.7
1	6	LA	Airborne	17	74.6
1	6	LA	Airborne	18	58.4
1	6	LA	Airborne	19	62.5
1	6	LA	Airborne	20	62.4
1	6	LA	Airborne	21	73.7
1	6	LA	Airborne	22	72.2
1	6	LA	Airborne	23	60.7
1	6	LA	Airborne	24	55.7
1	6	LA	Airborne	25	53.6
1	6	LA	Airborne	26	54.2
1	6	LA	Airborne	27	66.1
1	6	LA	Airborne	28	67.9
1	6	LA	Airborne	29	51.8
1	6	LA	Airborne	30	20.2
2	1	LA	Control	1	35.2
2	1	LA	Control	2	50.6
2	1	LA	Control	3	45.8
2	1	LA	Control	4	39.2
2	1	LA	Control	5	30.1
2	1	LA	Control	6	38.6
2	1	LA	Control	7	64.8
2	1	LA	Control	8	41.7
2	1	LA	Control	9	40.2
2	1	LA	Control	10	70.1
2	1	LA	Control	11	41.3
2	1	LA	Control	12	69.5
2	1	LA	Control	13	45.8
2	1	LA	Control	14	30.7
2	1	LA	Control	15	39.2
2	1	LA	Control	16	39.6
2	1	LA	Control	17	50.1
2	1	LA	Control	18	40.8
2	1	LA	Control	19	40.6
2	1	LA	Control	20	76.4
2	1	LA	Control	21	40
2	1	LA	Control	22	48.9
2	1	LA	Control	23	38
2	1	LA	Control	24	32.2
2	1	LA	Control	25	66.2
2	1	LA	Control	26	49.8
2	1	LA	Control	27	66.8
2	1	LA	Control	28	50.2
2	1	LA	Control	29	36.2
2	1	LA	Control	30	48.9
2	2	LA	Control	1	39.1
2	2	LA	Control	2	45.6
2	2	LA	Control	3	40.1
2	2	LA	Control	4	51.2
2	2	LA	Control	5	38.2
2	2	LA	Control	6	37.7
2	2	LA	Control	7	36.8
2	2	LA	Control	8	65.2
2	2	LA	Control	9	29.6
2	2	LA	Control	10	36.7
2	2	LA	Control	11	38.9
2	2	LA	Control	12	45.1
2	2	LA	Control	13	60
2	2	LA	Control	14	33.5
2	2	LA	Control	15	70.5
2	2	LA	Control	16	39.8
2	2	LA	Control	17	50.2
2	2	LA	Control	18	64.8
2	2	LA	Control	19	46.9
2	2	LA	Control	20	45.1
2	2	LA	Control	21	32.8
2	2	LA	Control	22	66.9
2	2	LA	Control	23	22.5
2	2	LA	Control	24	34.9
2	2	LA	Control	25	34.6
2	2	LA	Control	26	66.7
2	2	LA	Control	27	60
2	2	LA	Control	28	59.8
2	2	LA	Control	29	57.6
2	2	LA	Control	30	63.3
2	3	LA	Control	1	38.5
2	3	LA	Control	2	55.6
2	3	LA	Control	3	61.9
2	3	LA	Control	4	55.8
2	3	LA	Control	5	70.3
2	3	LA	Control	6	48.2
2	3	LA	Control	7	64.9
2	3	LA	Control	8	64.8
2	3	LA	Control	9	59.7
2	3	LA	Control	10	34.2
2	3	LA	Control	11	49.8
2	3	LA	Control	12	55.1
2	3	LA	Control	13	60
2	3	LA	Control	14	40.2
2	3	LA	Control	15	64.8
2	3	LA	Control	16	52.9
2	3	LA	Control	17	51.3
2	3	LA	Control	18	45.9
2	3	LA	Control	19	44.2
2	3	LA	Control	20	45
2	3	LA	Control	21	55.8
2	3	LA	Control	22	42.8
2	3	LA	Control	23	49.5
2	3	LA	Control	24	23.9
2	3	LA	Control	25	34.8
2	3	LA	Control	26	55.4
2	3	LA	Control	27	45
2	3	LA	Control	28	34.8
2	3	LA	Control	29	55.2
2	3	LA	Control	30	33.1
2	4	LA	Airborne	1	48.9
2	4	LA	Airborne	2	33.1
2	4	LA	Airborne	3	46.5
2	4	LA	Airborne	4	70.4
2	4	LA	Airborne	5	38.4
2	4	LA	Airborne	6	66.2
2	4	LA	Airborne	7	57.1
2	4	LA	Airborne	8	47.5
2	4	LA	Airborne	9	70.8
2	4	LA	Airborne	10	36.5
2	4	LA	Airborne	11	71.9
2	4	LA	Airborne	12	40.5
2	4	LA	Airborne	13	50.2
2	4	LA	Airborne	14	44.1
2	4	LA	Airborne	15	38
2	4	LA	Airborne	16	33.6
2	4	LA	Airborne	17	46.7
2	4	LA	Airborne	18	39.4
2	4	LA	Airborne	19	69.1
2	4	LA	Airborne	20	55.4
2	4	LA	Airborne	21	31.8
2	4	LA	Airborne	22	40.7
2	4	LA	Airborne	23	25.8
2	4	LA	Airborne	24	37.5
2	4	LA	Airborne	25	54.8
2	4	LA	Airborne	26	31.2
2	4	LA	Airborne	27	73.2
2	4	LA	Airborne	28	74.5
2	4	LA	Airborne	29	44.2
2	4	LA	Airborne	30	49.8
2	5	LA	Airborne	1	55.8
2	5	LA	Airborne	2	62.3
2	5	LA	Airborne	3	48.5
2	5	LA	Airborne	4	64.4
2	5	LA	Airborne	5	28.1
2	5	LA	Airborne	6	43.1
2	5	LA	Airborne	7	46.4
2	5	LA	Airborne	8	45.8
2	5	LA	Airborne	9	49.3
2	5	LA	Airborne	10	70.2
2	5	LA	Airborne	11	68.4
2	5	LA	Airborne	12	25.5
2	5	LA	Airborne	13	20.9
2	5	LA	Airborne	14	19.3
2	5	LA	Airborne	15	44.5
2	5	LA	Airborne	16	46.8
2	5	LA	Airborne	17	26.5
2	5	LA	Airborne	18	47.8
2	5	LA	Airborne	19	66.4
2	5	LA	Airborne	20	60.8
2	5	LA	Airborne	21	58.1
2	5	LA	Airborne	22	34.7
2	5	LA	Airborne	23	68.2
2	5	LA	Airborne	24	68
2	5	LA	Airborne	25	74.6
2	5	LA	Airborne	26	22.4
2	5	LA	Airborne	27	70.1
2	5	LA	Airborne	28	70.9
2	5	LA	Airborne	29	25.4
2	5	LA	Airborne	30	26.2
2	6	LA	Airborne	1	55.2
2	6	LA	Airborne	2	48.2
2	6	LA	Airborne	3	46.5
2	6	LA	Airborne	4	61.1
2	6	LA	Airborne	5	64.4
2	6	LA	Airborne	6	67.5
2	6	LA	Airborne	7	41.5
2	6	LA	Airborne	8	68.5
2	6	LA	Airborne	9	44.6
2	6	LA	Airborne	10	65.1
2	6	LA	Airborne	11	39.9
2	6	LA	Airborne	12	64.8
2	6	LA	Airborne	13	76.5
2	6	LA	Airborne	14	34
2	6	LA	Airborne	15	40.2
2	6	LA	Airborne	16	37.2
2	6	LA	Airborne	17	32.1
2	6	LA	Airborne	18	58.1
2	6	LA	Airborne	19	38
2	6	LA	Airborne	20	36.8
2	6	LA	Airborne	21	49.5
2	6	LA	Airborne	22	74.9
2	6	LA	Airborne	23	65.2
2	6	LA	Airborne	24	70.8
2	6	LA	Airborne	25	64.3
2	6	LA	Airborne	26	61.8
2	6	LA	Airborne	27	32.4
2	6	LA	Airborne	28	48.2
2	6	LA	Airborne	29	28.4
2	6	LA	Airborne	30	35.1

## Sheet: MixPop
Trial	Box_No	Site	Treatment	Snail_No	Height
1	1	LA	Water	1	75.4
1	1	LA	Water	2	73.9
1	1	LA	Water	3	64.3
1	1	LA	Water	4	39.8
1	1	LA	Water	5	40.7
1	1	LA	Water	6	50.8
1	1	LA	Water	7	36.5
1	1	LA	Water	8	5.9
1	1	LA	Water	9	45.1
1	1	LA	Water	10	43.2
1	1	LA	Water	11	59.8
1	1	LA	Water	12	49.9
1	1	LA	Water	13	48.6
1	1	LA	Water	14	48.2
1	1	LA	Water	15	39.2
1	1	NC	Water	16
1	1	NC	Water	17	18.7
1	1	NC	Water	18	38.5
1	1	NC	Water	19	21.1
1	1	NC	Water	20	67
1	1	NC	Water	21	34.1
1	1	NC	Water	22	23.8
1	1	NC	Water	23	26.4
1	1	NC	Water	24	31.3
1	1	NC	Water	25	19.5
1	1	NC	Water	26	31
1	1	NC	Water	27	15.5
1	1	NC	Water	28	38.7
1	1	NC	Water	29	25.7
1	1	NC	Water	30	40.9
1	2	LA	Water	1	65.6
1	2	LA	Water	2	45.6
1	2	LA	Water	3	53.4
1	2	LA	Water	4	57.9
1	2	LA	Water	5	34.7
1	2	LA	Water	6	67.4
1	2	LA	Water	7	41.7
1	2	LA	Water	8	74.4
1	2	LA	Water	9	39.9
1	2	LA	Water	10	52.5
1	2	LA	Water	11	43.2
1	2	LA	Water	12	18.5
1	2	LA	Water	13	39.6
1	2	LA	Water	14	21.9
1	2	LA	Water	15	20.6
1	2	NC	Water	16
1	2	NC	Water	17	34.5
1	2	NC	Water	18	31.3
1	2	NC	Water	19	24.7
1	2	NC	Water	20	23.9
1	2	NC	Water	21	38.9
1	2	NC	Water	22	42.2
1	2	NC	Water	23	3.6
1	2	NC	Water	24	19.8
1	2	NC	Water	25	23.5
1	2	NC	Water	26	42.9
1	2	NC	Water	27	12.4
1	2	NC	Water	28	8.2
1	2	NC	Water	29	24.8
1	2	NC	Water	30	31.8
1	3	LA	Water	1	47.2
1	3	LA	Water	2	21.2
1	3	LA	Water	3	66.5
1	3	LA	Water	4	59.4
1	3	LA	Water	5	48.5
1	3	LA	Water	6	33.5
1	3	LA	Water	7	51.5
1	3	LA	Water	8	45.8
1	3	LA	Water	9	28.8
1	3	LA	Water	10	51.6
1	3	LA	Water	11	20.8
1	3	LA	Water	12	53.5
1	3	LA	Water	13	48
1	3	LA	Water	14	33.7
1	3	LA	Water	15	59.5
1	3	NC	Water	16
1	3	NC	Water	17	23.8
1	3	NC	Water	18	18.2
1	3	NC	Water	19	17.8
1	3	NC	Water	20	21.2
1	3	NC	Water	21	28.5
1	3	NC	Water	22	19.5
1	3	NC	Water	23	16.8
1	3	NC	Water	24	26.7
1	3	NC	Water	25	19.9
1	3	NC	Water	26	22.8
1	3	NC	Water	27	23.8
1	3	NC	Water	28	27.1
1	3	NC	Water	29	15.4
1	3	NC	Water	30	45.5
1	4	LA	Air	1	59.4
1	4	LA	Air	2	53.1
1	4	LA	Air	3	49.7
1	4	LA	Air	4	42.3
1	4	LA	Air	5	49.5
1	4	LA	Air	6	60.5
1	4	LA	Air	7	57.4
1	4	LA	Air	8	25.9
1	4	LA	Air	9	67.3
1	4	LA	Air	10	67.2
1	4	LA	Air	11	57.8
1	4	LA	Air	12	23.5
1	4	LA	Air	13	68.4
1	4	LA	Air	14	16.5
1	4	LA	Air	15
1	4	NC	Air	16
1	4	NC	Air	17	16.3
1	4	NC	Air	18	18.6
1	4	NC	Air	19	24.6
1	4	NC	Air	20	6.7
1	4	NC	Air	21	5.6
1	4	NC	Air	22	6.2
1	4	NC	Air	23	5.9
1	4	NC	Air	24	36.8
1	4	NC	Air	25	43.4
1	4	NC	Air	26	15.3
1	4	NC	Air	27	24.4
1	4	NC	Air	28	41.5
1	4	NC	Air	29	36.6
1	4	NC	Air	30	0
1	5	LA	Air	1	71.7
1	5	LA	Air	2	51.1
1	5	LA	Air	3	50.5
1	5	LA	Air	4	50.1
1	5	LA	Air	5	66
1	5	LA	Air	6	62.4
1	5	LA	Air	7	34.3
1	5	LA	Air	8	22.1
1	5	LA	Air	9	65.1
1	5	LA	Air	10	50.1
1	5	LA	Air	11	73.2
1	5	LA	Air	12	70.6
1	5	LA	Air	13	50.3
1	5	LA	Air	14	57.6
1	5	LA	Air	15
1	5	NC	Air	16	4.9
1	5	NC	Air	17	49.2
1	5	NC	Air	18	26.5
1	5	NC	Air	19	23.7
1	5	NC	Air	20	53.9
1	5	NC	Air	21	5.2
1	5	NC	Air	22	30.6
1	5	NC	Air	23	22.2
1	5	NC	Air	24	39.5
1	5	NC	Air	25	67.2
1	5	NC	Air	26	4.8
1	5	NC	Air	27	38.4
1	5	NC	Air	28	29.8
1	5	NC	Air	29	54.8
1	5	NC	Air	30	0
1	6	LA	Air	1	23
1	6	LA	Air	2	22.4
1	6	LA	Air	3	75
1	6	LA	Air	4	66.9
1	6	LA	Air	5	54.5
1	6	LA	Air	6	45.9
1	6	LA	Air	7	66.8
1	6	LA	Air	8	74.8
1	6	LA	Air	9	37.2
1	6	LA	Air	10	35.8
1	6	LA	Air	11	34.2
1	6	LA	Air	12	51.2
1	6	LA	Air	13	56.4
1	6	LA	Air	14	50.9
1	6	LA	Air	15
1	6	NC	Air	16	32.8
1	6	NC	Air	17	48.5
1	6	NC	Air	18	48.7
1	6	NC	Air	19	19.9
1	6	NC	Air	20	20.8
1	6	NC	Air	21	13.4
1	6	NC	Air	22	28.7
1	6	NC	Air	23	6.1
1	6	NC	Air	24	18.9
1	6	NC	Air	25	5.5
1	6	NC	Air	26	31.5
1	6	NC	Air	27	21.4
1	6	NC	Air	28	22.6
1	6	NC	Air	29	23.7
1	6	NC	Air	30	0
2	1	LA	Control	1	11.3
2	1	LA	Control	2	33.4
2	1	LA	Control	3	29.3
2	1	LA	Control	4	25.6
2	1	LA	Control	5	50
2	1	LA	Control	6	23.1
2	1	LA	Control	7	30.5
2	1	LA	Control	8	37.2
2	1	LA	Control	9	23.2
2	1	LA	Control	10	40.3
2	1	LA	Control	11	15.4
2	1	LA	Control	12	23.9
2	1	LA	Control	13	10.2
2	1	LA	Control	14	29.8
2	1	LA	Control	15	20.4
2	1	NC	Control	16	17.4
2	1	NC	Control	17	34.6
2	1	NC	Control	18	9.8
2	1	NC	Control	19	10.1
2	1	NC	Control	20	28.4
2	1	NC	Control	21	18.5
2	1	NC	Control	22	18.1
2	1	NC	Control	23	15.4
2	1	NC	Control	24	9.6
2	1	NC	Control	25	20.3
2	1	NC	Control	26	9.8
2	1	NC	Control	27	14.8
2	1	NC	Control	28	33.9
2	1	NC	Control	29	4.6
2	1	NC	Control	30	0
2	2	LA	Control	1	21
2	2	LA	Control	2	12.9
2	2	LA	Control	3	41.6
2	2	LA	Control	4	24.7
2	2	LA	Control	5	30.6
2	2	LA	Control	6	24.3
2	2	LA	Control	7	36.9
2	2	LA	Control	8	10.6
2	2	LA	Control	9	30.1
2	2	LA	Control	10	10.8
2	2	LA	Control	11	27.4
2	2	LA	Control	12	50.6
2	2	LA	Control	13	16.8
2	2	LA	Control	14	39.4
2	2	LA	Control	15	23.4
2	2	NC	Control	16	25.9
2	2	NC	Control	17	36.2
2	2	NC	Control	18	3.2
2	2	NC	Control	19	13.2
2	2	NC	Control	20	9.7
2	2	NC	Control	21	19.2
2	2	NC	Control	22	17
2	2	NC	Control	23	10.2
2	2	NC	Control	24	22.1
2	2	NC	Control	25	4.6
2	2	NC	Control	26	40.2
2	2	NC	Control	27	14.1
2	2	NC	Control	28	12.3
2	2	NC	Control	29	22.5
2	2	NC	Control	30	0
2	3	LA	Control	1	14.6
2	3	LA	Control	2	22.6
2	3	LA	Control	3	23
2	3	LA	Control	4	36
2	3	LA	Control	5	27
2	3	LA	Control	6	9.3
2	3	LA	Control	7	25.8
2	3	LA	Control	8	20.8
2	3	LA	Control	9	49
2	3	LA	Control	10	35.2
2	3	LA	Control	11	48.6
2	3	LA	Control	12	30.4
2	3	LA	Control	13	29.2
2	3	LA	Control	14	27.8
2	3	LA	Control	15	12.5
2	3	NC	Control	16	14.3
2	3	NC	Control	17	46.2
2	3	NC	Control	18	19.1
2	3	NC	Control	19	10.4
2	3	NC	Control	20	4.9
2	3	NC	Control	21	9.1
2	3	NC	Control	22	19.4
2	3	NC	Control	23	6.2
2	3	NC	Control	24	36.4
2	3	NC	Control	25	18.2
2	3	NC	Control	26	22.6
2	3	NC	Control	27	8.3
2	3	NC	Control	28	17.6
2	3	NC	Control	29	14
2	3	NC	Control	30	0
2	4	LA	Air	1	49.5
2	4	LA	Air	2	57
2	4	LA	Air	3	59.1
2	4	LA	Air	4	62.4
2	4	LA	Air	5	60.4
2	4	LA	Air	6	50.1
2	4	LA	Air	7	53.7
2	4	LA	Air	8	23.1
2	4	LA	Air	9	56.2
2	4	LA	Air	10	49.3
2	4	LA	Air	11	61.2
2	4	LA	Air	12	25.3
2	4	LA	Air	13	68
2	4	LA	Air	14	42.5
2	4	LA	Air	15	16.3
2	4	NC	Air	16	67
2	4	NC	Air	17	3.6
2	4	NC	Air	18	16.6
2	4	NC	Air	19	6.2
2	4	NC	Air	20	40.2
2	4	NC	Air	21	18.7
2	4	NC	Air	22	40.1
2	4	NC	Air	23	36.9
2	4	NC	Air	24	6.4
2	4	NC	Air	25	5.1
2	4	NC	Air	26	15.7
2	4	NC	Air	27	5
2	4	NC	Air	28	36
2	4	NC	Air	29	39.2
2	4	NC	Air	30	21.3
2	5	LA	Air	1	67.4
2	5	LA	Air	2	49.6
2	5	LA	Air	3	62.1
2	5	LA	Air	4	20.8
2	5	LA	Air	5	54.2
2	5	LA	Air	6	70.3
2	5	LA	Air	7	60.9
2	5	LA	Air	8	74.8
2	5	LA	Air	9	52.8
2	5	LA	Air	10	70.3
2	5	LA	Air	11	48.3
2	5	LA	Air	12	33.2
2	5	LA	Air	13	60.1
2	5	LA	Air	14	54
2	5	LA	Air	15	57.2
2	5	NC	Air	16
2	5	NC	Air	17	20.2
2	5	NC	Air	18	54.8
2	5	NC	Air	19	6.4
2	5	NC	Air	20	3.8
2	5	NC	Air	21	61
2	5	NC	Air	22	26.5
2	5	NC	Air	23	37.5
2	5	NC	Air	24	48.6
2	5	NC	Air	25	35.4
2	5	NC	Air	26	54.8
2	5	NC	Air	27	20.3
2	5	NC	Air	28	5
2	5	NC	Air	29	29.4
2	5	NC	Air	30	0
2	6	LA	Air	1	67.1
2	6	LA	Air	2	32.4
2	6	LA	Air	3	48.3
2	6	LA	Air	4	20.2
2	6	LA	Air	5	55.8
2	6	LA	Air	6	36.4
2	6	LA	Air	7	24.6
2	6	LA	Air	8	34
2	6	LA	Air	9	49.2
2	6	LA	Air	10	70.4
2	6	LA	Air	11	45.9
2	6	LA	Air	12	50.6
2	6	LA	Air	13	60.4
2	6	LA	Air	14	63.4
2	6	LA	Air	15	57.7
2	6	NC	Air	16	77.1
2	6	NC	Air	17	48.3
2	6	NC	Air	18	26.4
2	6	NC	Air	19	10.2
2	6	NC	Air	20	31.6
2	6	NC	Air	21	20.6
2	6	NC	Air	22	20.1
2	6	NC	Air	23	49.4
2	6	NC	Air	24	30.2
2	6	NC	Air	25	18.2
2	6	NC	Air	26	3.6
2	6	NC	Air	27	14.7
2	6	NC	Air	28	23.8
2	6	NC	Air	29	0
2	6	NC	Air	30
